# Supplementary material
Source: publisher figshare collection journal article supplement (https://gsapubs.figshare.com/ndownloader/files/23708711)
Supplement: Supplementary file 1 [file 23708711]

## Sheet: Sheet1
Table S2: Metadata of LA-MC-ICPMS U-Pb and Lu-Hf data used in this study
Sample Preparation
Sample type/mineral	Detrital zircons
Sample preparation	Traditional heavy liquid and magnetic techniques, 1 inch resin mount, 1 mm polish to finish
Imaging	Gatan Mono CL 4+ spectrometer attached to FEI Quanta 450 field emission scanning Electron Microscope, 13.4 mm working distance
LA-ICPMS U-Pb analyses
Laboratory name	Department of Earth Sciences, University of Hong Kong
Laser ablation system
Make, Model and type	Resonetics LLC USA, RESOlution M-50, ArF excimer
Ablation cell and volume	Two-volume laser-ablation cell (Laurin Technic, Australia), effective volume ∼1–2 cm3
Laser wavelength (nm)	193 nm
Pulse width (ns)	~20 ns
Fluence (J cm-2)	5 J cm-2
Repetition rate (Hz)	6 Hz
Ablation duration (s)	45 s
Ablation pit depth / ablation rate	not available
Spot diameter (mm) nominal/actual	0.03 mm
Sampling mode / pattern	spot
Carrier gas	100% He in the cell, N2 were introduced into the make-up gas via a T-connector
Cell carrier gas flow (l min-1)	500 ml/min He + 2 ml/min N2, Ar make-up gas.
ICP-MS Instrument
Make, Model and type	Nu Instruments, Nu Plasma HR, MC-ICPMS
Sample introduction	Ablation aerosol
RF power (W)	1300 W
Make-up gas flow (l min-1)	400 ml/min Ar
Detection system	Mixed Faraday-multiple ion counting array
Masses measured	172–179, 204, 206, 207, 238
Integration time per peak/dwell times (ms); quadrupole settling time between mass jumps	not available
Total integration time per output data point (s)	not available
‘Sensitivity’ as useful yield (%, element)	not available for quadrupole ICPMS
IC Dead time (ns)	not available
Data Processing
Gas blank	30 s on-peak zero subtracted
Calibration strategy	91500 used as calibration standard, GJ-1 used as quality control for validation
Reference Material info	91500 (Wiedenbeck et al. 1995)
	GJ-1 (Jackson et al. 2004)
Data processing package used / Correction for LIEF	Commercial software ICPMSDataCal was intially developed by Prof. Yong-sheng LIU of GUG. LIEF correction assumes reference material and samples behave identically, namely standard-samples-standard bracketing.
Mass discrimination	not available
Common-Pb correction, composition and uncertainty	No common-Pb correction applied to the data.
Uncertainty level and propagation	Ages are quoted at 2s absolute, propagation is processed by the ICPMSDataCal software. Reproducibility and age uncertainty of reference material are propagated.
Quality control / Validation	GJ-1 – Weighted ave 206Pb/238U age = 602.3 ± 1 (2σ, MSWD = 0.6, n = 25)
	Systematic uncertainty for propagation is 1.5% (1s).
Other information	Sample line of 3.5 m from ablation cell to torch and a 30 s washout time after the laser stopped firing.
LA-MC-ICPMS Lu-Hf analyses
Laboratory and Sample Preparation
Laboratory name	State Key Laboratory of Geological Processes and Mineral Resources, China University of Geosciences (Wuhan)
Laser ablation system
Make, Model and type	Lambda Physik, Gttingen, Germany, GeoLas2005 laser ablation system
Ablation cell and volume	HelEx II active 2-volume ablation cell, ~5 cm3 for small cell
Laser wavelength (nm)	193 nm
Pulse width (ns)	5 ns
Fluence (J cm-2)	5.3 J cm-2
Repetition rate (Hz)	6 Hz
Ablation duration (s)	40 s
Ablation pit depth / ablation rate	about 15μm
Spot diameter (mm) nominal/actual	44 μm
Sampling mode / pattern	Static spot ablation
Carrier gas	100% He in the cell, N2 were introduced into the make-up gas via a T-connector
Cell carrier gas flow (l min-1)	0.85 L/min
MC-ICP-MS Instrument
Make, Model and type	Thermo Fisher Scientific, Germany, Neptune Plus MC-ICP-MS
Sample introduction	dry aerosol by laser ablation
RF power	1270 W
Make-up gas flow (l min-1)	ca. 0.3-1.31 L/min
Detection system	Faraday cups
Masses measured	171Yb, 173Yb, 174(Hf+Yb), 175Lu,176(Hf+Yb+Lu), 177Hf, 179Hf, 180(Hf+W), 182W
Integration time per peak/dwell times (ms); quadrupole settling time between mass jumps	1s
Total integration time per output data point (s)	70s
‘Sensitivity’ as useful yield (%, element)	not available
IC Dead time (ns)	not available
Data Processing
Gas blank	20 s on-peak zero subtracted
Calibration strategy	91500 used as calibration standard, GJ-1 used as quality control for validation
Reference Material info	91500 (Wu et al. 2006)
	GJ-1 (Yuan et al. 2008)
Data processing package used / Correction for LIEF	Commercial software ICPMSDataCal was intially developed by Prof. Yong-sheng LIU of GUG. LIEF correction assumes reference material and samples behave identically, namely standard-samples-standard bracketing.
Mass discrimination	internal calibration by 179Hf/177Hf and 173Yb/171Yb
Uncertainty level and propagation	Ages are quoted at 2s absolute, propagation is processed by the ICPMSDataCal software. Reproducibility and age uncertainty of reference material are propagated.
Quality control / Validation	91500 – Weighted ave 177Hf/176Hf = 0.282309 ± 0.000009 (2s, MSWD = 0.9, n = 6). GJ-1 – Weighted ave 177Hf/176Hf = 0.282013 ± 0.000006 (2s, MSWD = 1.1, n = 13)
	Systematic uncertainty for propagation is 0.0015% (1s).
Other information	ca. 2m sample line from ablation cell to torch and washout time was ca. 1s to 1% of peak signal.
